# Supplementary material for: The Neisseria meningitidis CRISPR-Cas9 System Enables Specific Genome Editing in Mammalian Cells
Source: PubMed Central journal article supplement — Mol Ther. 2016 Feb 16;24(3):645–54. doi: 10.1038/mt.2016.8 (PMC4786937; doi:10.1038/mt.2016.8), 2016-02-16
Supplement: mt20168x1.pdf [file mt20168x1.pdf]

# **The *Neisseria meningitidis* CRISPR-Cas9 System Enables Specific Genome Editing in Mammalian Cells**

Ciaran M. Lee, Thomas J. Cradick, Gang Bao

## **Supplementary Information**

### **Supplementary Figures**

**Supplementary Figure S1.** Effect of sequence on *Nm* Cas9 activity

**Supplementary Figure S2.** Alternative modeling of DNA bulges as shorter gRNAs with alternate PAMs

**Supplementary Figure S3.** Representative T7EI assay gel of CRISPR-Cas9 activity with gRNA lengths of 20 to 24 nt

**Supplementary Figure S4.** Indel profiles of different CRISPR-Cas9 systems

### **Supplementary Tables**

**Supplementary Table S1.** Activity of *Nm* gRNAs at different genomic loci

**Supplementary Table S2.** Luciferase SSA assay data

**Supplementary Table S3.** Activity of *Sp* and *Nm* CRISPR-Cas9 at predicted off-target loci

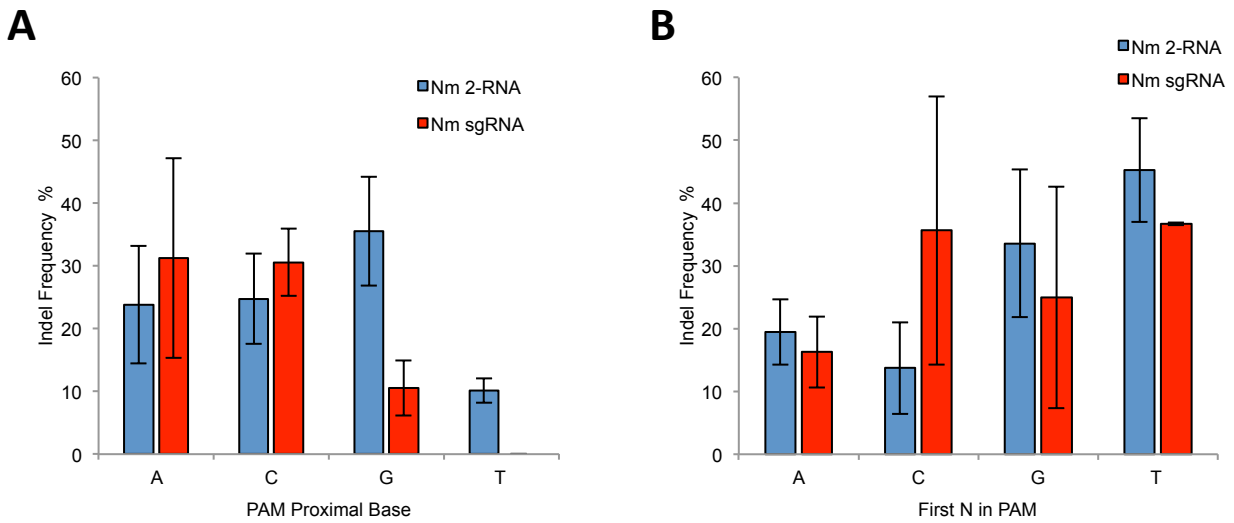

**Supplementary Figure S1: Effect of sequence on *Nm* Cas9 activity.** (a) The effect of the PAM proximal base on *Nm* Cas9 activity. Data represents the average activity level observed at 4, 6, 2, and 2 endogenous sites for targets containing A, C, G, or T at the PAM proximal position. (b) The effect of the first N in the PAM on *Nm* Cas9 activity. Data represents the average activity level observed at 7, 3, 2, and 2 endogenous sites for targets containing A, C, G, or T at the first position of the PAM. All experiments were carried out in HEK293T cells and all data derived from T7EI assays.

**A**

|                                                                       |                                                               |
|-----------------------------------------------------------------------|---------------------------------------------------------------|
| 5'- G C A T T A T G C T G A G G A T T T G G A A A <u>GGGTGTTT</u> -3' | <i>HPRT1</i>                                                  |
| G C A T T A T G C T G A G G A T T - G G A A A <u>GGGTGTTT</u>         | 22 base gRNA with 1 base DNA bulge                            |
| G C A T T A T G C T G A G G A T T G A A A G <u>GGTGTTTA</u>           | 22 base gRNA with 3 mismatches and non-canonical PAM sequence |

**B**

|                                                                  |                                    |
|------------------------------------------------------------------|------------------------------------|
| 5'- G C A T T A T G C T G A G G A T T T G G A A A <u>GGG</u> -3' | <i>HPRT1</i>                       |
| G C A T T A T G C T G A G G A T T T G G A A - <u>GGG</u>         | 19 base gRNA with 1 base DNA bulge |
| G C A T T A T G C T G A G G A T T T G G A A <u>AGG</u>           | 19 base gRNA with AGG PAM sequence |

**Supplemental Figure S2: Alternative modeling of DNA bulges as shorter gRNAs with alternate PAMs. A.** A *Nm* gRNA with a deletion at position 6 models a DNA bulge at this position. The alternative is a scenario with 3 mismatches close to the PAM and a PAM sequence not recognized by *Nm* (NNNNTTTA). **B.** A *Sp* gRNA with a deletion at position 1 was designed to model a DNA bulge at this position. However, due to the next base being a G, it creates a new PAM sequence for the 19 nt *Sp* gRNA.

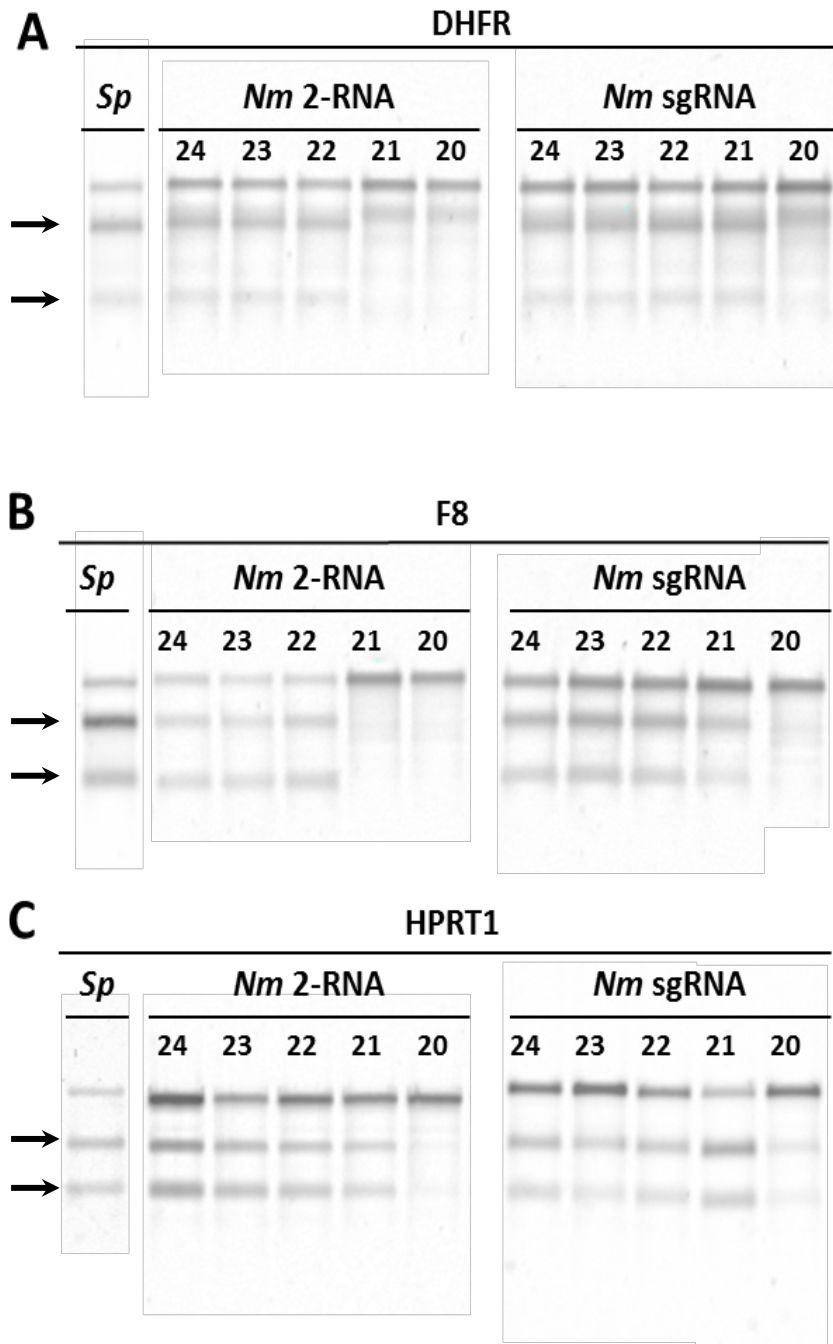

**Supplementary Figure S3: Representative T7EI assay gel of CRISPR-Cas9 activity with gRNA lengths of 20 to 24 nt. A.** Activity of CRISPR-Cas systems targeting *DHFR*. **B.** Activity of CRISPR-Cas systems targeting *F8\_Site 2*. **C.** Activity of CRISPR-Cas systems targeting *HPRT1*. Expected cleavage bands highlighted by arrows.

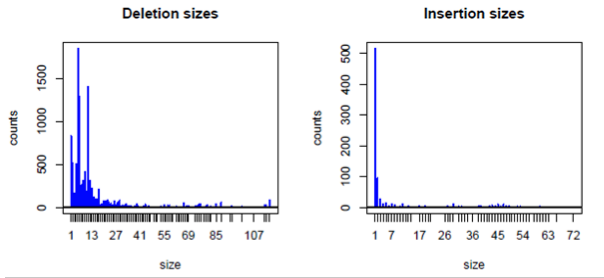

Nm 2-RNA *HPRT1*

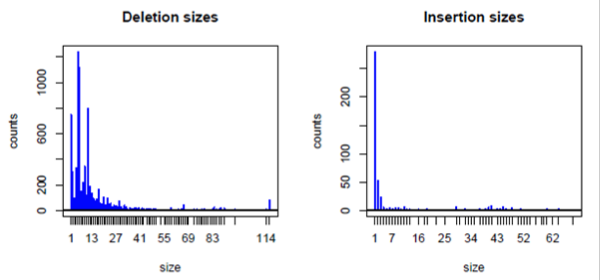

Nm sgRNA *HPRT1*

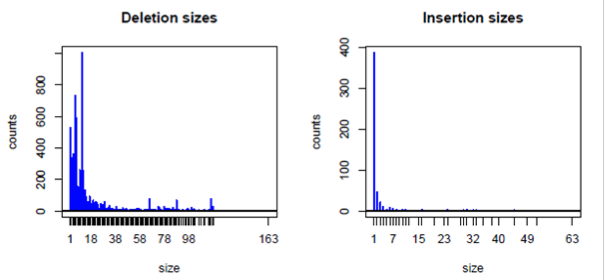

Sp *HPRT1*

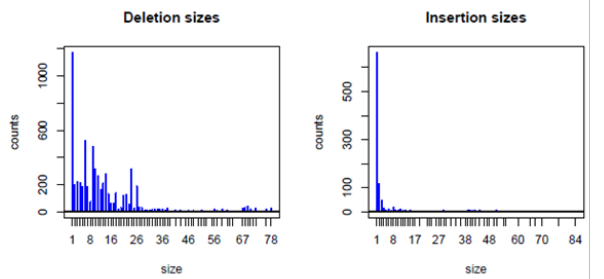

Nm 2-RNA *DHFR*

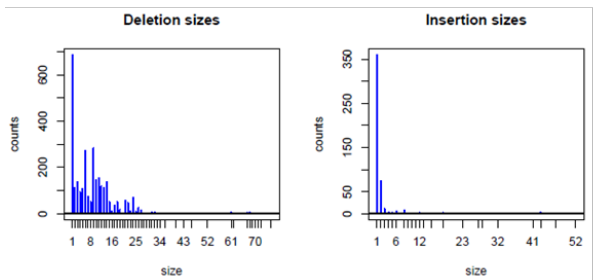

Nm sgRNA *DHFR*

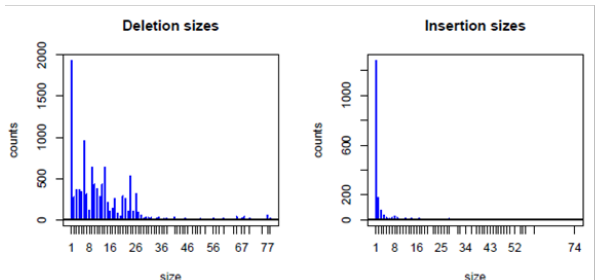

Sp *DHFR*

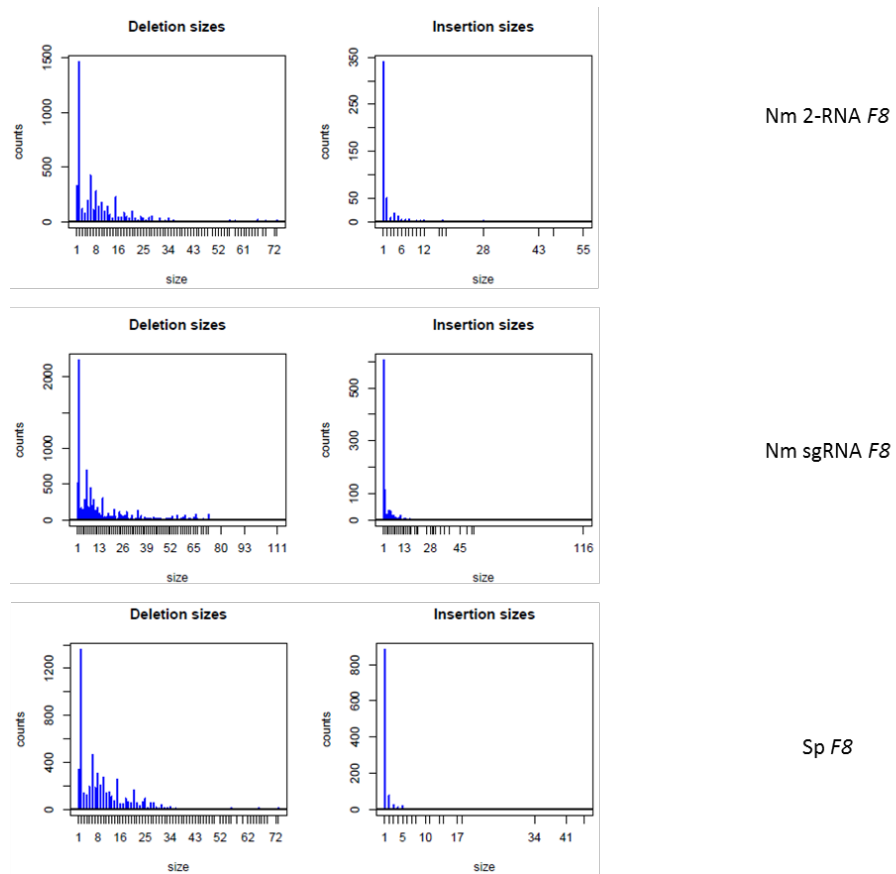

**Supplementary Figure S4: Indel profiles of different CRISPR-Cas9 systems.** Indel profiles generated by *Sp* and *Nm* CRISPR-Cas9 systems at three distinct genomic loci. All data derived from processed illumina MiSeq reads and analyzed using the CRISPR Genome Analyzer webtool<sup>1</sup>.

**Supplementary Table S2: Luciferase SSA assay data.**

| Guide        | Sequence                                                                                                          | Sp sgRNA     | Nm sgRNA     | Nm 2-RNA     |
|--------------|-------------------------------------------------------------------------------------------------------------------|--------------|--------------|--------------|
| <i>HPRT1</i> | GCAUUAUGCUGAGGAUUUGGAAA                                                                                           | 73.31 ± 3.89 | 52.61 ± 3.07 | 41.26 ± 0.92 |
| mm_22        | G <b>A</b> UUAUGCUGAGGAUUUGGAAA                                                                                   | n.t.         | n.t.         | 33.02 ± 1.88 |
| mm_21        | G <b>C</b> UUAUGCUGAGGAUUUGGAAA                                                                                   | n.t.         | n.t.         | 10.3 ± 0.2   |
| mm_20        | G <b>C</b> AUAUGCUGAGGAUUUGGAAA                                                                                   | n.t.         | 33.95 ± 1.93 | 12.43 ± 0.45 |
| mm_19        | GCAU <b>A</b> UGCUGAGGAUUUGGAAA                                                                                   | 62.6 ± 2.13  | 15.61 ± 1.42 | 6.69 ± 0.27  |
| mm_18        | GCAU <b>U</b> UGCUGAGGAUUUGGAAA                                                                                   | 10.11 ± 0.77 | 31.3 ± 6.52  | 8.69 ± 0.22  |
| mm_17        | GCAU <b>U</b> A <b>G</b> CGUGAGGAUUUGGAAA                                                                         | 8.73 ± 0.47  | 11.76 ± 2.14 | 1.84 ± 0.07  |
| mm_16        | GCAU <b>U</b> A <b>A</b> UGCUGAGGAUUUGGAAA                                                                        | 37.86 ± 3.13 | 18.15 ± 4.01 | 3.1 ± 0.07   |
| mm_15        | GCAU <b>U</b> A <b>U</b> GCUGAGGAUUUGGAAA                                                                         | 4.45 ± 0.44  | 15.23 ± 3.46 | 4.14 ± 0.19  |
| mm_14        | GCAU <b>U</b> A <b>U</b> G <b>C</b> AGAGGAUUUGGAAA                                                                | 5.52 ± 0.44  | 9.51 ± 0.54  | 2.07 ± 0.07  |
| mm_13        | GCAU <b>U</b> A <b>U</b> GC <b>U</b> AGGAUUUGGAAA                                                                 | 29.73 ± 2.2  | 13.47 ± 1.17 | 7.74 ± 0.13  |
| mm_12        | GCAU <b>U</b> A <b>U</b> GC <b>U</b> GAGGAUUUGGAAA                                                                | 23.05 ± 0.71 | 35.99 ± 5.16 | 13.09 ± 0.47 |
| mm_11        | GCAU <b>U</b> A <b>U</b> GC <b>U</b> GA <b>A</b> GAUUUGGAAA                                                       | 7.71 ± 0.54  | 10.8 ± 1.55  | 2.63 ± 0.04  |
| mm_10        | GCAU <b>U</b> A <b>U</b> GC <b>U</b> G <b>A</b> GAUUUGGAAA                                                        | 24.28 ± 0.17 | 11.35 ± 1.56 | 2.87 ± 0.07  |
| mm_9         | GCAU <b>U</b> A <b>U</b> GC <b>U</b> G <b>G</b> GAUUUGGAAA                                                        | 54.23 ± 3.02 | 14.29 ± 0.74 | 2.94 ± 0.06  |
| mm_8         | GCAU <b>U</b> A <b>U</b> GC <b>U</b> G <b>G</b> A <b>A</b> UUGGAAA                                                | 5.42 ± 0.08  | 6.45 ± 0.36  | 0.96 ± 0.06  |
| mm_7         | GCAU <b>U</b> A <b>U</b> GC <b>U</b> G <b>G</b> GA <b>U</b> AUGGAAA                                               | 43.81 ± 1.85 | 12.22 ± 1.42 | 15.55 ± 0.23 |
| mm_6         | GCAU <b>U</b> A <b>U</b> GC <b>U</b> G <b>G</b> GA <b>U</b> A <b>A</b> GGAAA                                      | 15.82 ± 1.48 | 5.94 ± 0.05  | 2.97 ± 0.12  |
| mm_5         | GCAU <b>U</b> A <b>U</b> GC <b>U</b> G <b>G</b> GA <b>U</b> A <b>U</b> AGAAA                                      | 9.56 ± 0.21  | 6.8 ± 0.53   | 1.97 ± 0.03  |
| mm_4         | GCAU <b>U</b> A <b>U</b> GC <b>U</b> G <b>G</b> GA <b>U</b> A <b>U</b> U <b>A</b> AAA                             | 8.64 ± 0.06  | 6.63 ± 0.66  | 41.19 ± 2.93 |
| mm_3         | GCAU <b>U</b> A <b>U</b> GC <b>U</b> G <b>G</b> GA <b>U</b> A <b>U</b> U <b>G</b> AAA                             | 30.66 ± 0.65 | 10.38 ± 1.04 | 5.48 ± 0.21  |
| mm_2         | GCAU <b>U</b> A <b>U</b> GC <b>U</b> G <b>G</b> GA <b>U</b> A <b>U</b> U <b>G</b> A <b>G</b>                      | 65.65 ± 3.27 | 10.84 ± 1.33 | 6.2 ± 0.2    |
| mm_1         | GCAU <b>U</b> A <b>U</b> GC <b>U</b> G <b>G</b> GA <b>U</b> A <b>U</b> U <b>G</b> A <b>A</b> <b>G</b>             | 64.46 ± 6.06 | 7.59 ± 0.47  | 16.14 ± 0.42 |
| Ins_22       | G <b>A</b> CAUUAUGCUGAGGAUUUGGAAA                                                                                 | n.t.         | n.t.         | 40.55 ± 0.86 |
| Ins_21       | G <b>C</b> UUAUAUGCUGAGGAUUUGGAAA                                                                                 | n.t.         | n.t.         | 22.3 ± 0.35  |
| Ins_20       | G <b>C</b> A <b>G</b> UUAUGCUGAGGAUUUGGAAA                                                                        | n.t.         | 41.4 ± 4.3   | 18.06 ± 0.35 |
| Ins_19       | GCAU <b>A</b> UAUGCUGAGGAUUUGGAAA                                                                                 | 50.49 ± 2.59 | 36.04 ± 3.51 | 40.15 ± 1.76 |
| Ins_18       | GCAU <b>U</b> G <b>A</b> UGCUGAGGAUUUGGAAA                                                                        | 29.57 ± 1.23 | 10.82 ± 1.13 | 12.12 ± 0.46 |
| Ins_17       | GCAU <b>U</b> A <b>G</b> UGCUGAGGAUUUGGAAA                                                                        | 11.39 ± 0.48 | 1.3 ± 0.15   | 0.99 ± 0.09  |
| Ins_16       | GCAU <b>U</b> A <b>A</b> AGCUGAGGAUUUGGAAA                                                                        | 1.39 ± 0.07  | 1.33 ± 0.14  | 1.13 ± 0.09  |
| Ins_15       | GCAU <b>U</b> A <b>A</b> U <b>A</b> CUGAGGAUUUGGAAA                                                               | 0.97 ± 0.05  | 1.17 ± 0.16  | 2.96 ± 0.36  |
| Ins_14       | GCAU <b>U</b> A <b>A</b> U <b>G</b> C <b>A</b> UGAGGAUUUGGAAA                                                     | 1.14 ± 0.05  | 2.21 ± 0.09  | 37.99 ± 3.47 |
| Ins_13       | GCAU <b>U</b> A <b>A</b> U <b>G</b> C <b>U</b> AGAGGAUUUGGAAA                                                     | 0.87 ± 0.05  | 1.03 ± 0.04  | 2.76 ± 0.22  |
| Ins_12       | GCAU <b>U</b> A <b>A</b> U <b>G</b> C <b>U</b> AUGGAUUUGGAAA                                                      | 1.57 ± 0.1   | 1.07 ± 0.06  | 10.9 ± 1.1   |
| Ins_11       | GCAU <b>U</b> A <b>A</b> U <b>G</b> C <b>U</b> GAUGGAUUUGGAAA                                                     | 1.52 ± 0.06  | 1.13 ± 0.06  | 6.64 ± 0.43  |
| Ins_10       | GCAU <b>U</b> A <b>A</b> U <b>G</b> C <b>U</b> G <b>A</b> GAUUUGGAAA                                              | 0.79 ± 0.02  | 1.07 ± 0.04  | 4.17 ± 0.2   |
| Ins_9        | GCAU <b>U</b> A <b>A</b> U <b>G</b> C <b>U</b> G <b>G</b> UUAUUGGAAA                                              | 0.83 ± 0.03  | 1 ± 0.05     | 1.14 ± 0.05  |
| Ins_8        | GCAU <b>U</b> A <b>A</b> U <b>G</b> C <b>U</b> G <b>G</b> GA <b>G</b> UUGGAAA                                     | 0.8 ± 0.03   | 0.94 ± 0.09  | 1.56 ± 0.37  |
| Ins_7        | GCAU <b>U</b> A <b>A</b> U <b>G</b> C <b>U</b> G <b>G</b> GA <b>A</b> UUGGAAA                                     | 0.82 ± 0.04  | 1.12 ± 0.11  | 1.46 ± 0.07  |
| Ins_6        | GCAU <b>U</b> A <b>A</b> U <b>G</b> C <b>U</b> G <b>G</b> GA <b>U</b> AUGGAAA                                     | 0.95 ± 0.05  | 1.38 ± 0.13  | 1.13 ± 0.05  |
| Ins_5        | GCAU <b>U</b> A <b>A</b> U <b>G</b> C <b>U</b> G <b>G</b> GA <b>U</b> A <b>U</b> AGGAAA                           | 0.81 ± 0.04  | 1.77 ± 0.52  | 1.86 ± 0.09  |
| Ins_4        | GCAU <b>U</b> A <b>A</b> U <b>G</b> C <b>U</b> G <b>G</b> GA <b>U</b> A <b>U</b> U <b>A</b> AGAAA                 | 0.89 ± 0.02  | 1.38 ± 0.17  | 1.07 ± 0.04  |
| Ins_3        | GCAU <b>U</b> A <b>A</b> U <b>G</b> C <b>U</b> G <b>G</b> GA <b>U</b> A <b>U</b> U <b>G</b> UAAA                  | 0.8 ± 0.02   | 1.35 ± 0.07  | 1.12 ± 0.06  |
| Ins_2        | GCAU <b>U</b> A <b>A</b> U <b>G</b> C <b>U</b> G <b>G</b> GA <b>U</b> A <b>U</b> U <b>G</b> A <b>U</b> AA         | 0.96 ± 0.02  | 1.43 ± 0.11  | 1.18 ± 0.08  |
| Ins_1        | GCAU <b>U</b> A <b>A</b> U <b>G</b> C <b>U</b> G <b>G</b> GA <b>U</b> A <b>U</b> U <b>G</b> A <b>A</b> U <b>A</b> | 0.95 ± 0.01  | 1.44 ± 0.08  | 1.11 ± 0.1   |
| Ins_0        | GCAU <b>U</b> A <b>A</b> U <b>G</b> C <b>U</b> G <b>G</b> GA <b>U</b> A <b>U</b> U <b>G</b> A <b>A</b> A <b>U</b> | 1.22 ± 0.02  | 1.45 ± 0.15  | 0.76 ± 0.06  |
| Δ_22         | G-AUUAUGCUGAGGAUUUGGAAA                                                                                           | n.t.         | n.t.         | 34.56 ± 0.82 |
| Δ_21         | GC-UUAUGCUGAGGAUUUGGAAA                                                                                           | n.t.         | n.t.         | 4.72 ± 0.14  |
| Δ_19/20      | GCA-UUUGCUGAGGAUUUGGAAA                                                                                           | 66.24 ± 5.44 | 27.76 ± 1.85 | 4.37 ± 0.16  |
| Δ_18         | GCAUU-UGCUGAGGAUUUGGAAA                                                                                           | 45.19 ± 4.07 | 3.19 ± 0.08  | 1.09 ± 0.06  |
| Δ_17         | GCAUUA-GCUGAGGAUUUGGAAA                                                                                           | 8.26 ± 0.7   | 1.08 ± 0.02  | 5.52 ± 0.04  |
| Δ_16         | GCAUUAU-CUGAGGAUUUGGAAA                                                                                           | 2.37 ± 0.17  | 0.71 ± 0.02  | 1.09 ± 0.02  |
| Δ_15         | GCAUUAUG-UGAGGAUUUGGAAA                                                                                           | 1.09 ± 0.01  | 1.02 ± 0.02  | 1.19 ± 0.11  |
| Δ_14         | GCAUUAUGC-GAGGAUUUGGAAA                                                                                           | 13.99 ± 0.66 | 0.86 ± 0.03  | 2.89 ± 0.15  |
| Δ_13         | GCAUUAUGCUC-AGGAUUUGGAAA                                                                                          | 5.39 ± 0.06  | 0.89 ± 0.03  | 1.16 ± 0.04  |
| Δ_12         | GCAUUAUGCUG-GGAUUUGGAAA                                                                                           | 1.89 ± 0.03  | 0.91 ± 0.02  | 1.07 ± 0.03  |
| Δ_10/11      | GCAUUAUGCUGA-GAUUUGGAAA                                                                                           | 3.54 ± 0.04  | 0.92 ± 0.02  | 1.18 ± 0.03  |
| Δ_9          | GCAUUAUGCUGAGG-UUUGGAAA                                                                                           | 1.17 ± 0.06  | 0.9 ± 0.05   | 1.09 ± 0.06  |
| Δ_6/7/8      | GCAUUAUGCUGAGGA-UUGGAAA                                                                                           | 1.25 ± 0.04  | 26.13 ± 0.98 | 1.91 ± 0.07  |
| Δ_4/5        | GCAUUAUGCUGAGGAUUU-GAAA                                                                                           | 3.58 ± 0.06  | 1.06 ± 0.05  | 1.06 ± 0.04  |
| Δ_1/2/3      | GCAUUAUGCUGAGGAUUUGG-AA                                                                                           | 53.94 ± 0.72 | 4.24 ± 0.27  | 6.19 ± 0.36  |

**Supplementary Table S2:** Relative light unit measurements from luciferase assays. Data represents the average values from biological triplicates ± the standard error of the mean. n.t. = not determined.

## Supplementary References

1. Guell, M., Yang, L. & Church, G.M. Genome editing assessment using CRISPR Genome Analyzer (CRISPR-GA). *Bioinformatics* **30**, 2968-2970 (2014).
