# Supplementary material for: The Neisseria meningitidis CRISPR-Cas9 System Enables Specific Genome Editing in Mammalian Cells
Source: PubMed Central journal article supplement — Mol Ther. 2016 Feb 16;24(3):645–54. doi: 10.1038/mt.2016.8 (PMC4786937; doi:10.1038/mt.2016.8), 2016-02-16
Supplement: mt20168x2.pdf [file mt20168x2.pdf]

**Supplementary Table 1: Activity of Nm Cas9 at endogenous loci**

| Gene  | gRNA   | Sequence                 |      |      |        | Indels (%) |       | NHEJ Primers             |                           |
|-------|--------|--------------------------|------|------|--------|------------|-------|--------------------------|---------------------------|
|       |        |                          | NNNN | PAM  | Length | 2-RNA      | sgRNA | Forward                  | Reverse                   |
| HPRT1 | NM_01  | GTCATTATGCTGAGGATTTGGAAA | GGGT | GTTT | 24     | 38         | 8     | GTGTCACCACACCCGGCTAA     | CCTACAGAGTCCCACATATAACCAC |
| HPRT1 | NM_02  | GCATTATGCTGAGGATTTGGAAA  | GGGT | GTTT | 23     | 45         | 18    |                          |                           |
| HPRT1 | NM_03  | GATTATGCTGAGGATTTGGAAA   | GGGT | GTTT | 22     | 37         | 24    |                          |                           |
| HPRT1 | NM_04  | GTTATGCTGAGGATTTGGAAA    | GGGT | GTTT | 21     | 26         | 35    |                          |                           |
| HPRT1 | NM_05  | GTATGCTGAGGATTTGGAAA     | GGGT | GTTT | 20     | 2          | 8     |                          |                           |
| RYS2  | NM_06  | GGCAATAACAAGTCTCTTCCTGGT | AGGA | GATT | 24     | 10         | <     | AAGGAAGGAAGGGAGGGAGG     | GTGGTCTGAAGATGCCAATGGT    |
| RYS2  | NM_07  | GCAATAACAAGTCTCTTCCTGGT  | AGGA | GATT | 23     | 12         | <     |                          |                           |
| RYS2  | NM_08  | GAATAACAAGTCTCTTCCTGGT   | AGGA | GATT | 22     | 6          | <     |                          |                           |
| RYS2  | NM_09  | GATAACAAGTCTCTTCCTGGT    | AGGA | GATT | 21     | 3          | <     |                          |                           |
| RYS2  | NM_010 | GTAACAAGTCTCTTCCTGGT     | AGGA | GATT | 20     | <          | <     |                          |                           |
| HPRT1 | NM_041 | GGCATTACAGGATACAAACATTTG | ATTG | GATT | 24     | 20         | <     | GTGTCACCACACCCGGCTAA     | CCTACAGAGTCCCACATATAACCAC |
| HPRT1 | NM_042 | GCATTACAGGATACAAACATTTG  | ATTG | GATT | 23     | 25         | <     |                          |                           |
| HPRT1 | NM_043 | GATTACAGGATACAAACATTTG   | ATTG | GATT | 22     | 27         | 15    |                          |                           |
| HPRT1 | NM_044 | GTTACAGGATACAAACATTTG    | ATTG | GATT | 21     | 25         | 12    |                          |                           |
| HPRT1 | NM_045 | GTACAGGATACAAACATTTG     | ATTG | GATT | 20     | 8          | 13    |                          |                           |
| HPRT1 | NM_046 | GTGAGAGCATTACAGGATACAAAC | ATTT | GATT | 24     | 18         | 4     | GTGTCACCACACCCGGCTAA     | CCTACAGAGTCCCACATATAACCAC |
| HPRT1 | NM_047 | GGAGAGCATTACAGGATACAAAC  | ATTT | GATT | 23     | 18         | 6     |                          |                           |
| HPRT1 | NM_048 | GAGAGCATTACAGGATACAAAC   | ATTT | GATT | 22     | 22         | 8     |                          |                           |
| HPRT1 | NM_049 | GGAGCATTACAGGATACAAAC    | ATTT | GATT | 21     | 12         | <     |                          |                           |
| HPRT1 | NM_050 | GAGCATTACAGGATACAAAC     | ATTT | GATT | 20     | 12         | 14    |                          |                           |
| HPRT1 | NM_051 | GAGTGATGATGAACCAGGTTATGA | CCTT | GATT | 24     | 28         | 26    | GTGTCACCACACCCGGCTAA     | CCTACAGAGTCCCACATATAACCAC |
| HPRT1 | NM_052 | GGTGATGATGAACCAGGTTATGA  | CCTT | GATT | 23     | 22         | 53    |                          |                           |
| HPRT1 | NM_053 | GTGATGATGAACCAGGTTATGA   | CCTT | GATT | 22     | 24         | <     |                          |                           |
| HPRT1 | NM_054 | GGATGATGAACCAGGTTATGA    | CCTT | GATT | 21     | 4          | 45    |                          |                           |
| HPRT1 | NM_055 | GATGATGAACCAGGTTATGA     | CCTT | GATT | 20     | 3          | 74    |                          |                           |
| IL2RG | NM_066 | GAAGGAGAAGTTATGCTATAATC  | CACT | GATT | 24     | 4          | 27    | TGAGAGAGAACTGGGCAGTAGCAG | CAAGAGTTTAGGGATGTGGCCAAG  |
| IL2RG | NM_067 | GAGGAGAAGTTATGCTATAATC   | CACT | GATT | 23     | 5          | 33    |                          |                           |
| IL2RG | NM_068 | GGGAGAAGTTATGCTATAATC    | CACT | GATT | 22     | 1          | 31    |                          |                           |
| IL2RG | NM_069 | GGAGAAGTTATGCTATAATC     | CACT | GATT | 21     | <          | 16    |                          |                           |
| IL2RG | NM_070 | GAGAAGTTATGCTATAATC      | CACT | GATT | 20     | <          | 17    |                          |                           |
| IL2RG | NM_071 | GCTCTTCTCCTCAAGGAACAATC  | AGTG | GATT | 24     | 17         | 35    | TGAGAGAGAACTGGGCAGTAGCAG | CAAGAGTTTAGGGATGTGGCCAAG  |
| IL2RG | NM_072 | GTCTTCTCCTCAAGGAACAATC   | AGTG | GATT | 23     | 6          | 43    |                          |                           |
| IL2RG | NM_073 | GCTTCTCCTCAAGGAACAATC    | AGTG | GATT | 22     | 9          | 47    |                          |                           |
| IL2RG | NM_074 | GTTTCTCCTCAAGGAACAATC    | AGTG | GATT | 21     | 2          | 37    |                          |                           |
| IL2RG | NM_075 | GTCTCCTCAAGGAACAATC      | AGTG | GATT | 20     | <          | 31    |                          |                           |
| CTNS  | NM_076 | GCAGCGCCATTAGCATATAAAC   | AGGT | GATT | 24     | 12         | 9     | AACAGGTTGTGGTGCCTCCTGG   | ATCGGCAGCCTTGCTGGAAC      |

|              |         |                          |      |      |    |    |    |                          |                          |
|--------------|---------|--------------------------|------|------|----|----|----|--------------------------|--------------------------|
| <i>CTNS</i>  | NM_077  | GAGCGCCATTAGCATCATAAACC  | AGGT | GATT | 23 | 14 | 10 |                          |                          |
| <i>CTNS</i>  | NM_078  | GGCGCCATTAGCATCATAAACC   | AGGT | GATT | 22 | 11 | 8  |                          |                          |
| <i>CTNS</i>  | NM_079  | GCGCCATTAGCATCATAAACC    | AGGT | GATT | 21 | 4  | 16 |                          |                          |
| <i>CTNS</i>  | NM_080  | GGCCATTAGCATCATAAACC     | AGGT | GATT | 20 | <  | <  |                          |                          |
| <i>AAVS1</i> | NM_086  | GACCCACAGTGGGGCCACTAGGG  | ACAG | GATT | 24 | 39 | 1  | GTCCACTTCAGGACAGCATGTTG  | TGGCTACTGGCCTTATCTCACAGG |
| <i>AAVS1</i> | NM_087  | GCCCCACAGTGGGGCCACTAGGG  | ACAG | GATT | 23 | 35 | 1  |                          |                          |
| <i>AAVS1</i> | NM_088  | GCCCCACAGTGGGGCCACTAGGG  | ACAG | GATT | 22 | 44 | <  |                          |                          |
| <i>AAVS1</i> | NM_089  | GCCACAGTGGGGCCACTAGGG    | ACAG | GATT | 21 | <  | 6  |                          |                          |
| <i>AAVS1</i> | NM_090  | GCACAGTGGGGCCACTAGGG     | ACAG | GATT | 20 | <  | <  |                          |                          |
| <i>AAVS1</i> | NM_091  | GGGTCTAACCCCCACCTCCTGTTA | GGCA | GATT | 24 | 16 | <  | GTCCACTTCAGGACAGCATGTTG  | TGGCTACTGGCCTTATCTCACAGG |
| <i>AAVS1</i> | NM_092  | GGTCTAACCCCCACCTCCTGTTA  | GGCA | GATT | 23 | 18 | <  |                          |                          |
| <i>AAVS1</i> | NM_093  | GTCTAACCCCCACCTCCTGTTA   | GGCA | GATT | 22 | 22 | <  |                          |                          |
| <i>AAVS1</i> | NM_094  | GCTAACCCCCACCTCCTGTTA    | GGCA | GATT | 21 | 1  | <  |                          |                          |
| <i>AAVS1</i> | NM_095  | GTAACCCCCACCTCCTGTTA     | GGCA | GATT | 20 | <  | <  |                          |                          |
| <i>CLK3</i>  | NM_0113 | GGAGGGTCACCTGGTGTGCCGGAT | CGGC | GATT | 24 | 4  | <  | CATTCAGGCAATTACTGGTGGCCC | TTGACGTGTCCCTTGCAATATCCC |
| <i>CLK3</i>  | NM_0114 | GAGGGTCACCTGGTGTGCCGGAT  | CGGC | GATT | 32 | 4  | <  |                          |                          |
| <i>CLK3</i>  | NM_0115 | GGGGTCACCTGGTGTGCCGGAT   | CGGC | GATT | 22 | 4  | <  |                          |                          |
| <i>CLK3</i>  | NM_0116 | GGGTCACCTGGTGTGCCGGAT    | CGGC | GATT | 21 | 8  | <  |                          |                          |
| <i>CLK3</i>  | NM_0117 | GGTCACCTGGTGTGCCGGAT     | CGGC | GATT | 20 | <  | <  |                          |                          |
| <i>DHFR</i>  | NM_0118 | GTGATTTATAGGTAACAGAAATC  | TGGT | GATT | 24 | 30 | 33 | GCAGACTCCACACAGACGGT     | GGCCTACTGAATGATGGTTCAAG  |
| <i>DHFR</i>  | NM_0119 | GGATTTTATAGGTAACAGAAATC  | TGGT | GATT | 23 | 31 | 32 |                          |                          |
| <i>DHFR</i>  | NM_0120 | GATTTTATAGGTAACAGAAATC   | TGGT | GATT | 22 | 37 | 37 |                          |                          |
| <i>DHFR</i>  | NM_0121 | GTTTATAGGTAACAGAAATC     | TGGT | GATT | 21 | 18 | 36 |                          |                          |
| <i>DHFR</i>  | NM_0122 | GTTTATAGGTAACAGAAATC     | TGGT | GATT | 20 | 13 | 25 |                          |                          |
| <i>F8</i>    | NM_0128 | GGTTTCTAGTTGTGACAAGAACAC | TGGT | GATT | 24 | 39 | 36 | GGGAGAGAACCTCTAACAGAACG  | GCTCCAGGTGATGGATCATCAG   |
| <i>F8</i>    | NM_0129 | GTTTCTAGTTGTGACAAGAACAC  | TGGT | GATT | 32 | 43 | 34 |                          |                          |
| <i>F8</i>    | NM_0130 | GTTCTAGTTGTGACAAGAACAC   | TGGT | GATT | 22 | 48 | 30 |                          |                          |
| <i>F8</i>    | NM_0131 | GTCTAGTTGTGACAAGAACAC    | TGGT | GATT | 21 | 54 | 13 |                          |                          |
| <i>F8</i>    | NM_0132 | GCTAGTTGTGACAAGAACAC     | TGGT | GATT | 20 | <  | 2  |                          |                          |
| <i>F8_a</i>  | NM_0123 | GCTGATGTCGGTCCTTTGTATTCA | AGGA | GATT | 24 | <  | 15 | CCTCCATGCATGCCAAGGAAC    | GGAAGCTGCAGCAAGAATCCTGA  |
| <i>F8_a</i>  | NM_0124 | GTGATGTCGGTCCTTTGTATTCA  | AGGA | GATT | 32 | <  | <  |                          |                          |
| <i>F8_a</i>  | NM_0125 | GGATGTCGGTCCTTTGTATTCA   | AGGA | GATT | 22 | <  | <  |                          |                          |
| <i>F8_a</i>  | NM_0126 | GATGTCGGTCCTTTGTATTCA    | AGGA | GATT | 21 | <  | <  |                          |                          |
| <i>F8_a</i>  | NM_0127 | GTGTCGGTCCTTTGTATTCA     | AGGA | GATT | 20 | <  | <  |                          |                          |
