# Supplementary material for: The Neisseria meningitidis CRISPR-Cas9 System Enables Specific Genome Editing in Mammalian Cells
Source: PubMed Central journal article supplement — Mol Ther. 2016 Feb 16;24(3):645–54. doi: 10.1038/mt.2016.8 (PMC4786937; doi:10.1038/mt.2016.8), 2016-02-16
Supplement: mt20168x3.pdf [file mt20168x3.pdf]

**Supplementary Table S3. Activity of Sp and Nm CRISPR-Cas9 at predicted off-target loci**

| Sp Cas9 | Sequence                 | Location hg38             | Gene           | Feature    | Mock        |             |          | Treated     |             |
|---------|--------------------------|---------------------------|----------------|------------|-------------|-------------|----------|-------------|-------------|
|         |                          |                           |                |            | Indel Reads | Total Reads | % Indels | Indel Reads | Total Reads |
| DHFR_ON | TTTTATAGGTAAACAGAATCTGG  | chr5:80649480-80649502    | DHFR           | Exon       | 19          | 38816       | 0.05     | 24362       | 67623       |
| SD_OT1  | TTTTATAGGTAAACAGAATCAAG  | chr20:61340824-61340846   | CDH4           | Intron     | 5           | 17474       | 0.03     | 96          | 38182       |
| SD_OT2  | AATTATGGTAAACAGAATCCAG   | chr3:150716100-150716122  | ERICH6-AS1     | Intron     | 3           | 23246       | 0.01     | 5           | 50066       |
| SD_OT3  | AATTTTAGCTAAACAGAATCTGG  | chr13:55202642-55202664   | MIR5007        | Intergenic | 11          | 40058       | 0.03     | 16          | 65291       |
| SD_OT4  | CTTTTGAGATAAACAGAATCTGG  | chr5:163324724-163324746  | CCNG1          | Intergenic | 21          | 32157       | 0.07     | 17          | 40211       |
| SD_OT5  | CAATTTAGGTAAACAGAATCAAG  | chr13:37451359-37451381   | LINC01048      | Intergenic | 6           | 26412       | 0.02     | 8           | 43450       |
| SD_OT6  | AAATACAGGTAAACAGAATCCAG  | chr9:89910167-89910189    | LOC101927847   | Intergenic | 114         | 23182       | 0.49     | 158         | 56377       |
| SD_OT7  | AAATATGGTAAACAGAATCCAG   | chr9:70312811-70312833    | SMC5           | Intron     | 4           | 31811       | 0.01     | 2           | 45981       |
| SD_OT8  | ATTTAGAATAAACAGAATCCGG   | chr11:16695687-16695709   | SOX6           | Intron     | 4           | 23562       | 0.02     | 7           | 62543       |
| SD_OT9  | CTTTCTAGATAAACAGAATCAAG  | chr11:104455058-104455080 | LOC102723895   | Intergenic | 11          | 19886       | 0.06     | 15          | 45570       |
| SD_OT10 | AATTACTGGTAAACAGAATCCAG  | chr11:63200259-63200281   | SLC22A25 (10)  | Intron     | 1           | 24995       | 0.00     | 4           | 28263       |
| SD_OT11 | GTTTTCAGGC AAACAGAATCTGG | chr15:63094584-63094606   | TPM1           | Intergenic | 7           | 28389       | 0.02     | 12          | 38344       |
| SD_OT12 | ATTAATATGTAAACAGAATCAAG  | chr7:51469279-51469301    | COBL           | Intergenic | 9           | 22016       | 0.04     | 21          | 44310       |
| SD_OT13 | CCTAATAGTTAAACAGAATCCAG  | chr1:105018549-105018571  | LOC101928476   | Intergenic | 1           | 26125       | 0.00     | 4           | 30637       |
| SD_OT14 | ATCTGTAGCTAAACAGAATCTAG  | chr1:81781462-81781484    | LPHN2          | Intron     | 15          | 26338       | 0.06     | 17          | 48806       |
| SD_OT15 | CTTTTAGGTAACAGAATCTAG    | chr3:160203962-160203984  | IL12A-AS1      | Intron     | 2           | 43956       | 0.00     | 3           | 42969       |
| SD_OT16 | TTTAATAGTGAACAGAATCTGG   | chr4:35028476-35028498    | ARAP2          | Intergenic | 10          | 55621       | 0.02     | 10          | 75138       |
| SD_OT17 | CTTAAGAGTTAAACAGAATCCAG  | chr20:24246166-24246188   | FJL33581       | Intergenic | 2           | 42568       | 0.00     | 5           | 41383       |
| SD_OT18 | GTAGA-AGGTAAACAGAATCTGG  | chr18:26171136-26171157   | PSMA8 / DHFRP1 | Intron     | 6           | 16293       | 0.04     | 9           | 40950       |
| SD_OT19 | GTAGA-AGGTAAACAGAATCTGG  | chr6:31366749-31366770    | DHFRP2         | Intergenic | 16          | 20928       | 0.08     | 12          | 31146       |
| SD_OT20 | ATTATAGGTCAACAGAATCTGG   | chr15:48392787-48392809   | FBN1           | Intergenic | 2           | 30373       | 0.01     | 3           | 35052       |

| Nm Cas9 | Sequence                          | Location                  | Gene      | Feature    | Mock        |             |          | sgRNA Treated |             |
|---------|-----------------------------------|---------------------------|-----------|------------|-------------|-------------|----------|---------------|-------------|
|         |                                   |                           |           |            | Indel Reads | Total Reads | % Indels | Indel Reads   | Total Reads |
| DHFR_ON | GTGATTTTTATAGGTAAACAGAATCTGGTGATT | chr5:80649475-80649506    | DHFR      | Exon       | 19          | 38816       | 0.05     | 6421          | 55610       |
| ND_OT1  | GAAATATTCAGGTAAACAGAATCTCTTGT     | chr8:64850027-64850058    | CYP7B1    | Intergenic | 2           | 51798       | 0.00     | 0             | 55302       |
| ND_OT2  | AAATATTAT-GGGAAACAGAATCTGCAGATT   | chr4:148690476-148690506  | NR3C2     | Intergenic | 11          | 54038       | 0.02     | 3             | 30395       |
| ND_OT3  | TTAATTTATAGGTAAAGAATCAAATGATT     | chr9:20900423-20900454    | FOCAD     | Intron     | 43          | 57490       | 0.07     | 73            | 66537       |
| ND_OT4  | TTTCTGTTTAGG-AAACAGAATCTCTGCTT    | chr7:12302402-12302432    | VWDE      | Intergenic | 8           | 81574       | 0.01     | 3             | 63419       |
| ND_OT5  | TGTATTTTA-AGGGAACAGAATCTGCAGTTT   | chr7:151403651-151403681  | WDR86     | Intron     | 8           | 80321       | 0.01     | 6             | 60575       |
| ND_OT6  | CTTGTTTTCTAGGTAA-CAGAATCTTATGTTT  | chr1:219504572-219504602  | LYPLAL1   | Intergenic | 2           | 31643       | 0.01     | 9             | 53989       |
| ND_OT7  | TTTCTTTTAT-GGTAAAAATAATCATAAGATT  | chr17:51554583-51554613   | CA10      | Intergenic | 45          | 62390       | 0.07     | 33            | 47487       |
| ND_OT8  | TTCTTTTTATAGGTTAA-AAATCTAAAGATT   | chr10:27448879-27448909   | PTCHD3    | Intergenic | 135         | 45931       | 0.29     | 204           | 68241       |
| ND_OT9  | AACTTTTTAAGGTAATA-AACTGGGGTTT     | chr11:117048295-117048325 | SIK3      | Intron     | 23          | 40317       | 0.06     | 21            | 42971       |
| ND_OT10 | ATATTTTTATAGGAAA-AGTATCCTTAGTTT   | chr1:39155639-39155669    | MACF1     | Intron     | 18          | 79849       | 0.02     | 13            | 51878       |
| ND_OT11 | CTCCTTTTGTAGG-AAACAGAAGCCTATGATT  | chr10:25552204-25552234   | GPR158    | Intron     | 7           | 58567       | 0.01     | 11            | 58130       |
| ND_OT12 | GATATTTTGAAGGTAAACAGAATATAGTGATT  | chr7:127127934-127127965  | GRM8      | Intron     | 3           | 31299       | 0.01     | 2             | 43458       |
| ND_OT13 | ATTGTTATACAGGTAAACAGAATCTGAGTTT   | chr14:28701646-28701677   | FOXG1-AS1 | Intergenic | 7           | 31059       | 0.02     | 12            | 50349       |
| ND_OT14 | GAAATTTAGAG-TAAACAGAATTTGAAGGATT  | chr7:117455495-117455525  | CFTR      | Intergenic | 66          | 136900      | 0.05     | 47            | 68285       |
| ND_OT15 | TTATTTTTATAGGCAAAACATTCAAAATGTTT  | chr20:21946870-21946901   | LINC01432 | Intergenic | 0           | 8682        | 0.00     | 7             | 46046       |
| ND_OT16 | ACATTTGTTAGAGGTAAACAGAAT-CCTTGTTT | chr3:86422139-86422169    | CADM2     | Intergenic | 12          | 107018      | 0.01     | 20            | 116143      |
| ND_OT17 | TCTTTTTTATGGTAAA-AGAAATAGACAGATT  | chr2:41797372-41797402    | LOC388942 | Intergenic | 21          | 99208       | 0.02     | 19            | 81132       |
| ND_OT18 | AGAATTTTATAGGTAAATAGAATATTAGGATT  | chr4:81123234-81123258    | PRKG2     | Intron     | 3           | 37590       | 0.01     | 5             | 62353       |
| ND_OT19 | TCATTTTTATAGTTAAAGAAT-GATTGCTT    | chr10:56157234-56157256   | ZWINT     | Intergenic | 37          | 44355       | 0.08     | 36            | 62022       |
| ND_OT20 | AAATTTTTATGGTAAACAGTAT-ATGTGTTT   | chr7:112242118-112242148  | ZNF277    | Intron     | 13          | 52658       | 0.02     | 11            | 56758       |

| Sp Cas9 | Sequence                | Location                 | Gene | Feature | Mock        |             |          | Treated     |             |
|---------|-------------------------|--------------------------|------|---------|-------------|-------------|----------|-------------|-------------|
|         |                         |                          |      |         | Indel Reads | Total Reads | % Indels | Indel Reads | Total Reads |
| F8_ON   | TCTAGTTGTGACAAGAAGACTGG | chrX:154931586-154931608 | F8   | Exon    | 13          | 34244       | 0.04     | 13012       | 23681       |

|         |                                            |                           |                     |            |    |       |      |     |       |
|---------|--------------------------------------------|---------------------------|---------------------|------------|----|-------|------|-----|-------|
| SF_OT1  | TGAAGT <b>AGT</b> GACAAGAACACTAG           | chr2:18300441-18300463    | <i>RDH14</i>        | Intergenic | 9  | 27222 | 0.03 | 12  | 72012 |
| SF_OT2  | CCTC <b>TAT</b> TGTGACAAGAACAACAAG         | chr17:3418064-3418086     | <i>OR3A3</i>        | Intergenic | 9  | 34478 | 0.03 | 12  | 26961 |
| SF_OT3  | ACT <b>TTG</b> TGTGACAAGAACAACAAG          | chr3:197606408-197606430  | <i>LOC220729</i>    | Intergenic | 3  | 25034 | 0.01 | 11  | 55091 |
| SF_OT4  | C <b>TACT</b> TTTGTGACAAGAACAACAAG         | chr18:65711730-65711752   | <i>CDH7</i>         | Intergenic | 15 | 51199 | 0.03 | 9   | 54664 |
| SF_OT5  | CCTG <b>ATT</b> ATGACAAGAACAACAAG          | chr3:119455673-119455695  | <i>TMEM39A</i>      | Intron     | 4  | 27641 | 0.01 | 4   | 42038 |
| SF_OT6  | GCT <b>ATTTATA</b> TACAAGAACAACAAG         | chr1:53294379-53294401    | <i>LRP8</i>         | Intron     | 2  | 15765 | 0.01 | 12  | 28493 |
| SF_OT7  | GCTAG <b>CTGGT</b> ACAAGAACAACAAG          | chr10:85183697-85183719   | <i>LINC01519</i>    | Intergenic | 13 | 36896 | 0.04 | 160 | 25800 |
| SF_OT8  | T <b>TTA</b> ATTGTG <b>TA</b> AAGAACAACAAG | chr16:24493609-24493631   | <i>RBBP6</i>        | Intergenic | 7  | 30507 | 0.02 | 1   | 15830 |
| SF_OT9  | GCTG <b>CT</b> TGTG <b>GA</b> AAGAACAACAAG | chr14:104429385-104429407 | <i>C14orf180</i>    | Intergenic | 7  | 21857 | 0.03 | 8   | 64070 |
| SF_OT10 | ACTAG <b>ATG</b> CCAAGAACAACAAG            | chr11:94895719-94895741   | <i>AMOTL1</i>       | Intergenic | 6  | 34895 | 0.02 | 4   | 46116 |
| SF_OT11 | CCTAG <b>AGT</b> GAAGAACAACAAG             | chr6:133740862-133740884  | <i>TARID</i>        | Intron     | 12 | 43313 | 0.03 | 2   | 35984 |
| SF_OT12 | CCTA <b>TTCT</b> GAAAGAACAACAAG            | chr17:3212137-3212159     | <i>OR1A1</i>        | Intergenic | 9  | 36370 | 0.02 | 7   | 43932 |
| SF_OT13 | C <b>TTAG</b> TTGT <b>CA</b> GAAGAACAACAAG | chr1:158161025-158161047  | <i>CD1D</i>         | Intergenic | 3  | 50044 | 0.01 | 9   | 47983 |
| SF_OT14 | A <b>TTAG</b> CTGTG <b>ACC</b> AGAACAACAAG | chr12:40126208-40126230   | <i>SLC2A13</i>      | Intergenic | 5  | 40849 | 0.01 | 12  | 46200 |
| SF_OT15 | A <b>AT</b> -GATGTGACAAGAACAACAAG          | chr8:138011536-138011557  | <i>LOC101927822</i> | Intergenic | 15 | 38346 | 0.04 | 11  | 49675 |
| SF_OT16 | G <b>CT</b> -GATGTGACAAGAACAACAAG          | chr3:18263971-18263992    | <i>LOC339862</i>    | Intron     | 6  | 30850 | 0.02 | 12  | 45603 |
| SF_OT17 | A <b>CC</b> TGT-GTGACAAGAACAACAAG          | chr8:108019686-108019707  | <i>RSPO2</i>        | Intron     | 3  | 46437 | 0.01 | 9   | 54430 |
| SF_OT18 | AC-A <b>TTA</b> GTGACAAGAACAACAAG          | chr15:50258679-50258700   | <i>HDC</i>          | Intron     | 14 | 29800 | 0.05 | 15  | 55272 |
| SF_OT19 | CCG <b>AG</b> TTG <b>AG</b> ACTAGAACAACAAG | chr12:52923288-52923310   | <i>KRT8</i>         | Intron     | 9  | 84604 | 0.01 | 9   | 50722 |
| SF_OT20 | CC <b>AG</b> TTGG <b>ACC</b> AGAACAACAAG   | chr3:72124373-72124395    | <i>LINC00877</i>    | Intergenic | 9  | 32763 | 0.03 | 10  | 38069 |

|                |                                                           |                           |                     |            | Mock        |             |          | sg RNA Treated |             |
|----------------|-----------------------------------------------------------|---------------------------|---------------------|------------|-------------|-------------|----------|----------------|-------------|
| <i>Nm</i> Cas9 | Sequence                                                  | Location                  | Gene                | Feature    | Indel Reads | Total Reads | % Indels | Indel Reads    | Total Reads |
| F8_ON          | GGTTTCTAGTTGTGACAAGAACAACAAG                              | chrX:154931581-154931612  | <i>F8</i>           | Exon       | 13          | 34244       | 0.04     | 17208          | 58765       |
| NF_OT1         | GTTATCA <b>AGC</b> TGTG <b>AA</b> AAGAACAACAACAAG         | chr11:81451988-81452019   | <i>LOC101928989</i> | Intergenic | 6           | 54770       | 0.01     | 1              | 74649       |
| NF_OT2         | CTC <b>ATCT</b> TGTTG <b>GG</b> AC-AGAACAACAACAACAAG      | chr4:6449282-6449312      | <i>PPP2R2C</i>      | Intron     | 1           | 25192       | 0.00     | 1              | 115037      |
| NF_OT3         | TCTGTCT-GTTGT <b>CACT</b> AGAACAACAACAACAAG               | chr14:103807364-103807394 | <i>PPP1R13B</i>     | Intron     | 7           | 28275       | 0.02     | 8              | 93749       |
| NF_OT4         | CCATTCTAG <b>ATGTCA</b> CTAAGAACAACAACAAG                 | chr11:17758431-17758463   | <i>KCNC1</i>        | Intron     | 4           | 27963       | 0.01     | 10             | 70226       |
| NF_OT5         | GACTTCTAG-TGTG <b>ATT</b> AGAACACCTCTGTTT                 | chr1:62221585-62221615    | <i>L1TD1</i>        | Intergenic | 7           | 39236       | 0.02     | 14             | 58683       |
| NF_OT6         | TGACTC-AG <b>GT</b> GTGACA <b>CA</b> ACAACAACAACAACAAG    | chr8:72549441-72549471    | <i>KCNB2</i>        | Intron     | 1           | 39232       | 0.00     | 6              | 101133      |
| NF_OT7         | GAGATC-AG <b>TGGT</b> GACA <b>TA</b> ACAACAACAACAACAAG    | chr12:76595292-76595322   | <i>OSBPL8</i>       | Intergenic | 10          | 30435       | 0.03     | 3              | 90764       |
| NF_OT8         | CAATTCTA <b>CTTGTGA</b> AAAAACAACAACAACAACAAG             | chr4:103590707-103590738  | <i>TACR3</i>        | Intron     | 2           | 35073       | 0.01     | 7              | 103688      |
| NF_OT9         | TGCATT <b>AG</b> TTG-GAC <b>AAA</b> ACAACAACAACAACAAG     | chr11:34919571-34919601   | <i>PDHX</i>         | Intron     | 29          | 30595       | 0.09     | 34             | 73117       |
| NF_OT10        | CTGCTCT-G <b>GT</b> GTGACA <b>AGC</b> CACACATGATT         | chr17:14487388-14487418   | <i>HS3ST3B1</i>     | Intergenic | 8           | 17438       | 0.05     | 6              | 25539       |
| NF_OT11        | AAGTCTCA <b>CTTGT</b> ACAAGAA-ACTATGGTTT                  | chr4:61801542-61801572    | <i>LPHN3</i>        | Intron     | 4           | 46087       | 0.01     | 7              | 112550      |
| NF_OT12        | TTATT <b>TA</b> -TTGTGACAAGAACA <b>CA</b> TTAAGTTT        | chr13:47043063-47043093   | <i>HTR2A</i>        | Intergenic | 2           | 40161       | 0.00     | 6              | 110758      |
| NF_OT13        | TCCATCTAG <b>TGGT</b> CACAAGAACA <b>CT</b> CCCAGATT       | chr5:178551262-178551294  | <i>COL23A1</i>      | Intron     | 0           | 108         | 0.00     | 20             | 24377       |
| NF_OT14        | AACTTCTAGTTGTG <b>GCA</b> AGGA-ACACAGGTTT                 | chr19:4709257-4709287     | <i>DPP9</i>         | Intron     | 20          | 32561       | 0.06     | 8              | 71906       |
| NF_OT15        | ATGCTCTAGTT <b>CT</b> GACA-GAACA <b>G</b> TCCTGATT        | chr3:174218934-174218964  | <i>NLGN1</i>        | Intron     | 2           | 20981       | 0.01     | 2              | 105950      |
| NF_OT16        | CCTGTCTA <b>CTT</b> GTGACA <b>AA</b> CA <b>AA</b> TAGGCTT | chr9:95685454-95685484    | <i>LINC00476</i>    | Intergenic | 0           | 1082        | 0.00     | 10             | 87966       |
| NF_OT17        | GCTG <b>ACT</b> AGTTGTGACAAGAACA <b>TA</b> TATGGTTT       | chr5:153668581-153668612  | <i>GRIA1</i>        | Intron     | 3           | 42277       | 0.01     | 5              | 83060       |

|                |                                           |                          |                 |            | Mock        |             |          | Treated     |             |
|----------------|-------------------------------------------|--------------------------|-----------------|------------|-------------|-------------|----------|-------------|-------------|
| <i>Sp</i> Cas9 | Sequence                                  | Location                 | Gene            | Feature    | Indel Reads | Total Reads | % Indels | Indel Reads | Total Reads |
| HPSPON         | TTATGCTGAGGATTTGGAAAGGG                   | chrX:134473412-134473434 | <i>HPRT1</i>    | Exon       | 39          | 90377       | 0.04     | 14199       | 18835       |
| SH_OT1         | AGATGCTGAGGATTTGGAAACAG                   | chr9:18850591-18850613   | <i>ADAMTSL1</i> | Intron     | 16          | 88359       | 0.02     | 10565       | 76165       |
| SH_OT2         | A <b>AG</b> TGCTGAGGATTTGGAAAAAG          | chr14:44234312-44234334  | <i>FSCB</i>     | Intergenic | 9           | 43513       | 0.02     | 23          | 74296       |
| SH_OT3         | G <b>TTG</b> TGAGGATTTGGAAATAG            | chr6:128025116-128025138 | <i>PTPRK</i>    | Intron     | 21          | 117152      | 0.02     | 14          | 106425      |
| SH_OT4         | T <b>GCT</b> GGT <b>GAG</b> GATTTGGAAAAAG | chr4:144173348-144173370 | <i>GYPA</i>     | Intergenic | 128         | 104549      | 0.12     | 72          | 94169       |
| SH_OT5         | A <b>GAG</b> GGT <b>GAG</b> GATTTGGAAAGAG | chrX:49277223-49277245   | <i>PPP1R3F</i>  | Intron     | 24          | 106875      | 0.02     | 9           | 74314       |
| SH_OT6         | AT <b>CTG</b> CC <b>GAG</b> GATTTGGAAAAAG | chrX:114147063-114147085 | <i>XACT</i>     | Intergenic | 36          | 63921       | 0.06     | 16          | 40354       |
| SH_OT7         | GTATT <b>GAG</b> GAGGATTTGGAAAGAG         | chr9:97683356-97683378   | <i>XPA</i>      | Intron     | 10          | 46893       | 0.02     | 7           | 55163       |

|         |                         |                           |                  |            |    |        |      |    |       |
|---------|-------------------------|---------------------------|------------------|------------|----|--------|------|----|-------|
| SH_OT8  | ATTGCTGAAGATTTGGAAATGG  | chr12:12706721-12706743   | <i>GPR19</i>     | Intergenic | 11 | 64173  | 0.02 | 13 | 81505 |
| SH_OT9  | ATAAGCTGAGGTTTTGGAAAGAG | chr11:69522853-69522875   | <i>LINC01488</i> | Intergenic | 21 | 82103  | 0.03 | 19 | 74913 |
| SH_OT10 | TTATCTGAGGCTTTGGAAAGAG  | chr11:107227503-107227525 | <i>CWF19L2</i>   | Intergenic | 7  | 60916  | 0.01 | 15 | 80116 |
| SH_OT11 | AAATGCTTAGAATTTGGAAAAAG | chr13:78935858-78935880   | <i>LINC00331</i> | Intergenic | 40 | 92095  | 0.04 | 35 | 92193 |
| SH_OT12 | CCAGGCTGAGCATTGGAAACAG  | chr2:75542297-75542319    | <i>EVA1A</i>     | Intron     | 3  | 48516  | 0.01 | 5  | 27812 |
| SH_OT13 | TCAGCTCAGGGTTTGGAAAAAG  | chr9:134602667-134602689  | <i>COL5A1</i>    | Intergenic | 11 | 35396  | 0.03 | 14 | 43755 |
| SH_OT14 | AGATACTGAGTATTTGGAAAGAG | chr10:65363709-65363731   | <i>LINC01515</i> | Intergenic | 15 | 86246  | 0.02 | 18 | 74460 |
| SH_OT15 | CTCAGCTGAGGGTTTGGAAATGG | chr7:76409916-76409938    | <i>ZP3</i>       | Intron     | 7  | 38076  | 0.02 | 5  | 35833 |
| SH_OT16 | TTCTTCTGAGTATTTGGAAAGAG | chr11:5316658-5316680     | <i>OR51B2</i>    | Intergenic | 23 | 100611 | 0.02 | 8  | 89315 |
| SH_OT17 | TTCTGCAGAGTATTTGGAAAAAG | chr7:157005061-157005083  | <i>MXN1</i>      | Intron     | 41 | 70839  | 0.06 | 27 | 73454 |
| SH_OT18 | TTCTGCTTTGGATTTGGAAAGGG | chr3:139123737-139123759  | <i>BPESC1</i>    | Intron     | 15 | 45460  | 0.03 | 26 | 83052 |
| SH_OT19 | TTTTGGTGAGGCTTTGGAAAGGG | chr9:8153172-8153194      | <i>PTPRD</i>     | Intergenic | 29 | 97642  | 0.03 | 31 | 87184 |

| Nm Cas9 | Sequence                         | Location                  | Gene              | Feature    | Mock        |             |          | sgRNA Treated |             |
|---------|----------------------------------|---------------------------|-------------------|------------|-------------|-------------|----------|---------------|-------------|
|         |                                  |                           |                   |            | Indel Reads | Total Reads | % Indels | Indel Reads   | Total Reads |
| HPNMON  | ATCATTATGCTGAGGATTTGGAAAGGGTGTTT | chrX:134473408-134473439  | <i>HPRT1</i>      | Exon       | 39          | 90377       | 0.04     | 15192         | 63286       |
| NH_OT1  | CTTTTTGTGCTGTGGATTTGGAAACACTGTTT | chr5:22612338-22612369    | <i>CDH12</i>      | Intron     | 6           | 57354       | 0.01     | 14            | 83328       |
| NH_OT2  | AGTTTTATGATGATGATTTGGAAAGAATGTTT | chr3:108393632-108393663  | <i>MYH15</i>      | Intron     | 7           | 53151       | 0.01     | 9             | 65204       |
| NH_OT3  | TATCTTATGCAGAGGAATTGGAAATGTGCTT  | chr11:101512872-101512903 | <i>TRPC6</i>      | Intron     | 8           | 54510       | 0.01     | 8             | 72406       |
| NH_OT4  | TACTTCTGCAAGGATTTGGAAAACTGATT    | chr2:54332913-54332944    | <i>C2orf73</i>    | Intron     | 10          | 58491       | 0.02     | 14            | 65082       |
| NH_OT5  | CATATTTGCTGCTGATTTGGAAATGTGCTT   | chr1:50151661-50151692    | <i>ELAVL4</i>     | Intron     | 17          | 71101       | 0.02     | 13            | 81849       |
| NH_OT6  | CCCTTAAAGCTGGCATTGGAAAGGGAGGTT   | chr1:154465575-154465606  | <i>IL6R</i>       | Exon       | 12          | 47982       | 0.03     | 15            | 64389       |
| NH_OT7  | CAGCTTATGCTGAGGAAGTGGAAAGGTTGATT | chr4:37604445-37604476    | <i>RELL1</i>      | Intron     | 3           | 46231       | 0.01     | 8             | 74672       |
| NH_OT8  | CATTTTATACTGAGGATATGGAAAGTGTGTTT | chr6:125945042-125945073  | <i>HINT3</i>      | Intergenic | 4           | 72007       | 0.01     | 10            | 84934       |
| NH_OT9  | CCACTATGCAGAGGATTAAGAAAGGCTGATT  | chr13:96849496-96849527   | <i>HS6ST3</i>     | Intergenic | 12          | 53749       | 0.02     | 18            | 75090       |
| NH_OT10 | TCATTTCTGCTGAGATTTTGAAGCACGTTT   | chr18:29157955-29157986   | <i>CDH2</i>       | Intergenic | 4           | 67570       | 0.01     | 18            | 77857       |
| NH_OT11 | TAAATTATTCTGAGTATTTGAAAATAGAGTTT | chr15:45569282-45569313   | <i>HMG2P46</i>    | Intergenic | 5           | 57218       | 0.01     | 8             | 68424       |
| NH_OT12 | CAAGATATGCTAAGGATTGGGAAAAGTGGCTT | chr4:10405508-10405539    | <i>ZNF518B</i>    | Intergenic | 10          | 55722       | 0.02     | 19            | 73819       |
| NH_OT13 | CAAGATATGCTAAGGATTGGGAAAAGTGGCTT | chr4:10406724-10406755    | <i>ZNF518B</i>    | Intergenic | 20          | 54186       | 0.04     | 21            | 69081       |
| NH_OT14 | TGTCTTGTGCTGGGATTTGAAAAGTGGGGTT  | chr7:31944144-31944175    | <i>PDE1C</i>      | Intron     | 7           | 52646       | 0.01     | 10            | 85332       |
| NH_OT15 | CATATTCTGCTGAGGATCTGAAAAGTCTGCTT | chr15:22949770-22949801   | <i>CYFIP1</i>     | Intron     | 0           | 967         | 0.00     | 3             | 7578        |
| NH_OT16 | TGTATTACCCTGAGGATTTGGTAAGAGTCTT  | chr2:233774831-233774862  | <i>MROH2A</i>     | Intergenic | 13          | 76697       | 0.02     | 16            | 89721       |
| NH_OT17 | TTAATTATGTTGAGGATCTGGAACTTTGATT  | chr6:82606316-82606347    | <i>TPBG</i>       | Intergenic | 9           | 61139       | 0.01     | 6             | 80382       |
| NH_OT18 | ATGTTTATTCTGAGGATTTGCGAATATTGTTT | chr6:147073097-147073128  | <i>STXBP5-AS1</i> | Intron     | 1           | 71151       | 0.00     | 5             | 86746       |
| NH_OT19 | TTGACTATGCTGAGGATTTGCCAAATATGGTT | chr12:41575307-41575338   | <i>PDZRN4</i>     | Intergenic | 7           | 54063       | 0.01     | 13            | 81396       |

| % Indels | P Value    |  |  | Forward Primer                    | Reverse Primer                   |
|----------|------------|--|--|-----------------------------------|----------------------------------|
| 36.03    | 0          |  |  | CTCCACTATGAGACATGATTTTCTGTGGTGA   | GTGGCCCTGGCCAGGAATT              |
| 0.25     | 8.9987E-11 |  |  | GCAATCCTCCTGCTTAAGCCTC            | GGATGTTGCTTTCTGTTGCTTGGC         |
| 0.01     | 1.0000     |  |  | GAATCCACATTTTCAGCTGCAGG           | GGGCTGTTGAATTTTGTGCAAGGC         |
| 0.02     | 1.0000     |  |  | CTATGCATTTGTAGTCTTGTGATTTGGGGAG   | CTGCAGATGTAATTGTAGGATTTGAGCTTC   |
| 0.04     | 0.1938     |  |  | AGCTGACTTTTCTTACCCTCCTGG          | TAGACTCGCATGGAGCCTTGTTC          |
| 0.02     | 1.0000     |  |  | ACTGCTTCCATCACCATCCC              | GCCTGGAAGTTGGACTTTCAGAC          |
| 0.28     | 1          |  |  | TGAGGCCACATCATCTGA                | CCAGTGGTTTTGACATTGGTTC           |
| 0.00     | 0.2344     |  |  | GAAGGATGAAACACTTCCCAAGTCTTTTATG   | GGATGTCAAGTTTTTTCAGATGGTTTCTGC   |
| 0.01     | 1.0000     |  |  | ATTGCCTGATGGCAAGAGACAGAC          | AGGCCTGGCTAATTGTGTGTGTG          |
| 0.03     | 1.0000     |  |  | AAGTTGTTCAAACCTCACAGCAACCTTAGGG   | CATCATGCCCTTCTAGGCGC             |
| 0.01     | 0.3797     |  |  | CTCCCTAACTCATTCTATGAGGGC          | GCCTTTTCTGTATCTCTTGAGACAACCATG   |
| 0.03     | 0.6519     |  |  | CTTCTTTCAGGCAAATGGGCAACC          | GTCTATGGTATGCAGCAGAGTGG          |
| 0.05     | 0.8470     |  |  | GGCTGTGGTGAGTTGAGATTGC            | GTGAGATGTCATCTTGAAGGGGC          |
| 0.01     | 0.3829     |  |  | TCTTGGCCAAGGAGACCACAG             | GAAGCCGATGGTCAGTACTCGT           |
| 0.03     | 1.0000     |  |  | CCTCCCATCTGTAACCAACCTG            | GTAGTGACAAGGGTGTAGCTGAAG         |
| 0.01     | 0.6840     |  |  | CTGGTCAAGGCTAGCCTAGG              | AAGGGAGGGGAGAGATGCTG             |
| 0.01     | 1.0000     |  |  | GAGTCTTCGTTCTCATTTTCAAACCTTGAACGC | CTTCCCATAGGATTCATAGTTCTATGCTATCG |
| 0.01     | 0.2824     |  |  | CTCTTGACCAAGGGGACCTC              | CCAGAGCCAGGTTGTGATTCCG           |
| 0.02     | 1.0000     |  |  | TCGTGCTGTGTCCAGAAC                | GCCACCAACTATCCAGACCATG           |
| 0.04     | 0.0821     |  |  | GGCAAGAAAATGAGCTCGTTGTGG          | GAGCTCACCGCTGCTGTCAT             |
| 0.01     | 1.0000     |  |  | GTTTCTCTGGGTTCCAGGCTAAGG          | AATGCCTGTCTAGATCCACAGGAG         |

|          |         | 2-RNA Treated |             |          |         |                                    |                                       |
|----------|---------|---------------|-------------|----------|---------|------------------------------------|---------------------------------------|
| % Indels | P Value | Indel Reads   | Total Reads | % Indels | P Value |                                    |                                       |
| 11.55    | 0       | 14139         | 71676       | 19.73    | 0       | CTCCACTATGAGACATGATTTTCTGTGGTGA    | GTGGCCCTGGCCAGGAATT                   |
| 0.00     | 0.2339  | 0             | 77297       | 0.00     | 0.1610  | GGGGAGAGATAGAAAGCCTGC              | GTGGTGCCATTGTTGAAAACTAACCTCC          |
| 0.01     | 0.4041  | 1             | 21194       | 0.00     | 0.1986  | GGACTAGAGCAGCTTAGTGCA              | GCTTGGCTGTTGAGAACGTTCTTG              |
| 0.11     | 0.0502  | 55            | 79236       | 0.07     | 1.0000  | GCCTCAGCATTAGGTAATGAGCTC           | GCACAGATGCTAACATTATTCCTTGTACTTCATATCA |
| 0.00     | 0.3676  | 5             | 52942       | 0.01     | 1.0000  | ATCCATGTGGAGTCCAGGCATAG            | GGCACCAGGTGCCACCAATT                  |
| 0.01     | 1.0000  | 3             | 99273       | 0.00     | 0.0733  | CGGATCTGTTCCAGGGAAAG               | CGACCCCTGAGTTAAGTTCAGT                |
| 0.02     | 0.3485  | 16            | 95751       | 0.02     | 0.2739  | GTTGCCTGAGCTTGGCACTCT              | CCTCCTCTGGAATGGATAACTG                |
| 0.07     | 0.9094  | 59            | 85756       | 0.07     | 1.0000  | CTCACTGCAACCTCCGCCTA               | CCAGGAAGAAAAGTCAGTACTGGG              |
| 0.30     | 0.9117  | 202           | 81168       | 0.25     | 1.0000  | CCCCATCTCAGCTTTTTCTCCC             | GAGTCTACCACCTGCCATAAC                 |
| 0.05     | 0.6525  | 21            | 63057       | 0.03     | 0.0881  | CTCGGCTTCCAAAGTGTCTG               | CTGCTAAGGAATAATGGTTCAGAATGACCATC      |
| 0.03     | 1.0000  | 16            | 85571       | 0.02     | 0.6106  | GATTGCTTTCAGATCATGACACAGAAGAGG     | TTGAAACCCGGAGGCGGAAG                  |
| 0.02     | 0.3575  | 7             | 90979       | 0.01     | 1.0000  | GTGAATGTGTTTACTCTCAAGATTCCTTCTTA   | CCTTTTCTTTGGTGAGCACCAGC               |
| 0.00     | 0.6556  | 2             | 115561      | 0.00     | 0.0685  | TAGATTGGAAGGCCATGAGAGTGC           | AATCAATGCCTGGTCTCTCCTTCC              |
| 0.02     | 1.0000  | 11            | 99281       | 0.01     | 1.0000  | GCTTCTTGCATTTTACTCGAAGAGCTAG       | GTCAGAGCTGGAGTTGAGTCCAAT              |
| 0.07     | 1.0000  | 23            | 102194      | 0.02     | 0.0012  | CATTCCATGCCTGTACCAAAA              | TCCAACCATTTTGCCTTTTACC                |
| 0.02     | 0.6061  | 7             | 70917       | 0.01     | 1.0000  | GCTGTTCCGCAAGAGGCATTTT             | GGTAATGCCTTTAGAGTAGCCAG               |
| 0.02     | 0.2891  | 11            | 89621       | 0.01     | 1.0000  | GGAGTTTAAAATGCGGAGTTATAATGATGGAG   | CTGAAATGTCTTTCTTTAGGAAAGGTGGAAACTG    |
| 0.02     | 1.0000  | 18            | 109294      | 0.02     | 0.5219  | GCACCATTTGCTGAAAGGACTATTCTTCTC     | AAGTGCTCCAAGGAGCATTTTCTTTGAGCAT       |
| 0.01     | 1.0000  | 9             | 84593       | 0.01     | 1.0000  | GATCTAAATGTTCTACCAGTTCCTGAGGAACATA | GCAACAGAGCAAGACTCTGTCTCA              |
| 0.06     | 0.1239  | 70            | 105286      | 0.07     | 1.0000  | CAGTCAACCCAGGCTAG                  | GGAAGGCAGCAAATATTAATAGCATGGGAAC       |
| 0.02     | 0.6838  | 7             | 70776       | 0.01     | 0.0677  | CATGTTTCTTCTAGTGTGTTGAGAGC         | GTGTTTAAATAGCACAGCAGGTTGACTACAG       |

| % Indels | P Value |                          |                          |
|----------|---------|--------------------------|--------------------------|
| 54.95    | 0       |                          |                          |
|          |         | TTGCTTTTGCCTAGTGCTAGGGTG | TCTGGGAATGGGAGAGAACCTCTA |

|      |            |
|------|------------|
| 0.02 | 1.0000     |
| 0.04 | 0.2726     |
| 0.02 | 0.5701     |
| 0.02 | 0.2200     |
| 0.01 | 1.0000     |
| 0.04 | 0.1597     |
| 0.62 | 2.0876E-46 |
| 0.01 | 0.2785     |
| 0.01 | 1.0000     |
| 0.01 | 0.3448     |
| 0.01 | 0.0282     |
| 0.02 | 0.4547     |
| 0.02 | 0.0863     |
| 0.03 | 0.2234     |
| 0.02 | 0.1679     |
| 0.03 | 0.6361     |
| 0.02 | 0.1611     |
| 0.03 | 1.0000     |
| 0.02 | 0.3311     |
| 0.03 | 1.0000     |

|                                    |                                     |
|------------------------------------|-------------------------------------|
| CAATAGGCTTTTTCTGTTGTAAGAAGATCTTCTG | CTCTGCAAGTTAAGCTGCACTCTC            |
| GGGTAGAGGAGAGAACTAGGAC             | GTCTCTAGAAGCCGGTCTTCAG              |
| TCCATGCTTACACCACTACAGGC            | GCCCTGTGAGTTACCAAACGTAG             |
| CCAATGTTAAGTGAGTGTGACAGACAAAGAGTG  | CACTGAGCAAGTGCATTATTTTGTAAAGTCTTTTC |
| CTACTTGGGTTGACATTTCCCTGG           | GGTCTGTCAACCACAGGCATC               |
| CTCACAATGACCCTGTGTCTC              | CGACATCATAATCTGGTGCCATGG            |
| GAGAATGGCTGGTGAAGGC                | GATCTACTACTGCCACAGACCC              |
| CCAACCTCAGCCTCCAAAG                | TCAGCAGGAATGTATTGGACACTT            |
| GTTTCCTGAAACATGAGGAGGGTG           | TTCCCCCGTTCTACGGGTG                 |
| AGACTAGGCAGCTGGGGGAA               | GCATTATTGCTGAGGGACACTGAG            |
| CGTCTGACTCTCAGTGTCAATTGTG          | GCTTCTCCCTGAACTCTCC                 |
| CTGGGTATAAGGTCTTTATGCCCTTG         | CACTGGAAAAAGGGTCTCTGGG              |
| ATTGGAGGCTAGTTGTGTATAGTGTGAGG      | AATCTATGAACTTGGGGCACCTGG            |
| AGCACTTTGGGAGGCCAGA                | GTGCTAGCAAGAGCAGAGATGCAA            |
| GGATTTAGAAGGGTAGTCATTTCAACTGCTC    | GAGCACATGTCTGGAGCCATAAAC            |
| CTGAGTAACCAAGAGTGGATCAGG           | CTGATTCCATCCCTGTGGTGC               |
| GCTAGTAGCACTAAACCAGAGCAC           | GGTCTGAGCCAATTCTCAGTCAC             |
| CTGGGGACTAATGTGAATACCACC           | GCACAGAGTTGGCACCAGGA                |
| CTCCAAAGTGCTCTAGGATGTGTG           | CAACACAGCGAGACTCCATCTCA             |
| AGCCTGGTCCCTGAAGGCTTT              | CCTGCAGGGAAAAACAAAGTCAAGC           |

| % Indels | P Value     | 2-RNA Treated |             |          | P Value     |                                 |                           |
|----------|-------------|---------------|-------------|----------|-------------|---------------------------------|---------------------------|
|          |             | Indel Reads   | Match Reads | % Indels |             |                                 |                           |
| 29.28    | 0           | 10187         | 36874       | 27.63    | 0           | TTGCTTTTGCCTAGTGCTAGGGTG        | TCTGGGAATGGGAGAGAACCCTCTA |
| 0.00     | 0.0469      | 0             | 25242       | 0.00     | 0.1863      | AAAGCCAGGCAGGCAGGTTTC           | CCCTCCTTCTCTCTCTCTTTTC    |
| 0.00     | 1.0000      | 4             | 81116       | 0.00     | 1.0000      | CCACTCGTGGGATTTACCTTCAG         | CTGTGTTTTCACTCCTCTCCAGC   |
| 0.01     | 1.0000      | 10            | 89358       | 0.01     | 1.0000      | GCTTTTCCTTAACCGAGAGTCTACC       | CTGGGCAACAGCGTGATACTC     |
| 0.01     | 1.0000      | 10            | 48450       | 0.02     | 0.7824      | TGCAGCAATTCAGTCACTCTTCA         | GCCCATGGACCAAGGAGTCA      |
| 0.02     | 0.6580      | 12            | 61703       | 0.02     | 1.0000      | CTGTCTCAACTGAGAGAGCTGG          | AACCCAGGAGGTGGAGCTTG      |
| 0.01     | 0.6815      | 8             | 41434       | 0.02     | 0.0397      | CCACTGAGAAGTTCCTGTTGAGC         | GCCCCCTAACATCAAGGTGTC     |
| 0.00     | 0.000131235 | 13            | 70730       | 0.02     | 1.0000      | GAAAACAACACTCACAGCCTTTGTGCCAATG | GCAGTCCATTTGGAGTTAGCACC   |
| 0.01     | 1.0000      | 0             | 65715       | 0.00     | 0.1211      | TGCTTGTGGGGTGTGAGGAA            | TCTGCTTCCAGATAAAAAACCTT   |
| 0.05     | 1.0000      | 40            | 35604       | 0.11     | 0.5464      | GTGCTGGCAGCATTTTTATGAGCTATGAC   | GTGCCTGGCACCTAATAGATGCT   |
| 0.02     | 0.2765      | 15            | 37405       | 0.04     | 1.0000      | TGGTCTGCCCCAGACATGGA            | CGTAAGTGCAACCGCCTGG       |
| 0.01     | 1.0000      | 7             | 67854       | 0.01     | 1.0000      | AGAAGGAGCAATTGATGCCTTATACCACG   | CTATTTGAGCTCCAGCACCTGATG  |
| 0.01     | 1.0000      | 11            | 68702       | 0.02     | 0.1513      | GGTGGTTTCCAGGGGCTGT             | TGTTTCAATAGCTTGAGCAAAAATG |
| 0.08     | 1.0000      | 0             | 2           | 0.00     | 1.0000      | GCTCTTGGTTTGAACTTTTGTGTGC       | CCAATTTGTAAGACCCACTGATGA  |
| 0.01     | 1.40403E-05 | 21            | 71876       | 0.03     | 1.0000      | GAAATTCTGACCTCGTGATCTGCC        | CGCACGATTTTTCTCCTTCCCAC   |
| 0.00     | 1.0000      | 7             | 82561       | 0.01     | 1.0000      | CCAGCTGACAGTAGCCCATTTTC         | GCAGTAGCTGGTGTATTGACATC   |
| 0.01     | 1.0000      | 20            | 78180       | 0.03     | 1.0000      | GGGCTTTACTGGTGAGTTCTTGC         | GCTGGCTGGTTTCCCTGGTT      |
| 0.01     | 1.0000      | 16            | 64026       | 0.02     | 0.034980447 | GCCCAAAAATTTGGGAAAGCCATGCTC     | GCTAGGTTCTCTCCTTGACAC     |

| % Indels | P Value |  |  |                                       |                          |
|----------|---------|--|--|---------------------------------------|--------------------------|
|          |         |  |  |                                       |                          |
| 13.87    | 0       |  |  | CCAGAGGCTGACTGTAGAAGAG                | GGTAGGTTGACTGGGCTAG      |
| 0.03     | 0.3621  |  |  | CCATGACATTGGTCTGGGTGATGA              | GCAGTGAACATGGGAGTGCAG    |
| 0.01     | 0.4012  |  |  | GATCACACAGTACTAGTTTATTTTGCAGTACAACAAG | CAATCTGTCTGAGCCAGAGACTTC |
| 0.08     | 0.0014  |  |  | CTCATCAGACTAATCACCGATGAAATGC          | CGACAAGAGCAAGACTCCATCTCA |
| 0.01     | 0.1149  |  |  | AATGGCAGTCTGTGACTGCTCTGA              | GCTAGTGAGCACTAGTCAAGCTG  |
| 0.04     | 0.2580  |  |  | GGAGTGAGATTGCTGGGTCACA                | GGACAAGACACCTACCAAAGAGGA |
| 0.01     | 0.3351  |  |  | CCTGAATCACAAAGGTAAGGCACAC             | GAGGTGATTTCAAGGTAGCTGAG  |

|      |        |
|------|--------|
| 0.02 | 1.0000 |
| 0.03 | 1.0000 |
| 0.02 | 0.3898 |
| 0.04 | 0.5663 |
| 0.02 | 0.1501 |
| 0.03 | 1.0000 |
| 0.02 | 0.3850 |
| 0.01 | 0.7756 |
| 0.01 | 0.0191 |
| 0.04 | 0.0692 |
| 0.03 | 1.0000 |
| 0.04 | 0.5193 |

|                                   |                                  |
|-----------------------------------|----------------------------------|
| CAAGAGAGAAGTAGGGAGACCATG          | CCATCTGCTTACTCGACATCTCC          |
| GCAGACCTGATTAGCTTTGACTCC          | GGCCTGACCTCCAGCATTGA             |
| TTTTTCCTGCTGGTACTCGCAGGAC         | GAACCATAAACAAGCACTTAAGACAAGCACTG |
| GGTAGGAAACGGTGGTTCCAG             | CCAGGGCCACTGCTACTGAA             |
| CCTTCTGCCATGATTGTGAGGCC           | TGTTTTGCCTGATGTTGGGCTGTG         |
| AGGAAGAATGTGGCTCGCC               | TCCTTAGCTTGATGGCCCC              |
| CAAGAGAGCTTATCAGTTATCAACTCTCTAAGG | GGGGAAAAATGATAGGGCATGTAGAAGAG    |
| GTTCAGGTTTCAGGAAGGCCTGG           | CCATTGCACTCCAGCAGCCT             |
| GTAGAGGTGGCATTGGAGTATGCA          | CCTGGCACTCACCTATGCTG             |
| TGAGAAGAACCACCCACCC               | GTGGGCGATGGGAGAAGCTA             |
| AGCACATGTA CTGCCTTTCTCCAC         | TCAATGGGCTTTTGGGTTAGGGAG         |
| GTATTCTTTGAGCACGTACCCAG           | CAGCCAACAAGCATTGAAAAAGATTCTCAGC  |

| % Indels | P Value | 2-RNA Treated |             |          | P Value |                                     |                                     |
|----------|---------|---------------|-------------|----------|---------|-------------------------------------|-------------------------------------|
|          |         | Indel Reads   | Match Reads | % Indels |         |                                     |                                     |
| 24.01    | 0       | 21902         | 66258       | 33.06    | 0       | GTTTGTATCCTGTAATGCTCTCATTGAAACAGCT  | CTGATACTAAGTAATTAGTAAGGCCCTCCTC     |
| 0.02     | 0.3713  | 9             | 80008       | 0.01     | 1.0000  | TTTAGAAAGATAGAGAATCATCCGTCATTGCCAC  | CTGGTGAGCTCTTTTCTTCCTTC             |
| 0.01     | 1.0000  | 11            | 74978       | 0.01     | 1.0000  | GCAGGAGTCTTCTTTTGTGGTTAAGCC         | CAGCCAACCTGAGCTCAACATC              |
| 0.01     | 1.0000  | 15            | 82851       | 0.02     | 0.6768  | GATTTCCCTAACTTCTGCACACATACTCC       | GTCCTTGGGGATCTGAACCTGAG             |
| 0.02     | 0.6842  | 19            | 82174       | 0.02     | 0.5726  | GGAGTTTACTCCAGCTTTGTTGAATACCC       | TGTTGGGTGATAACTATGAGAAACAGGTGG      |
| 0.02     | 0.2776  | 16            | 74072       | 0.02     | 0.8623  | CCCTCTTCCGAGTCAACAAATC              | CCCAGCCTCATTTAGGCATATCC             |
| 0.02     | 1.0000  | 13            | 65847       | 0.02     | 1.0000  | GCTTCTCACTGCCATGCCAGCT              | TGCAGAGGTGTTGAGGGTG                 |
| 0.01     | 0.5485  | 7             | 70060       | 0.01     | 0.7492  | TCCCCAAGTGACCCCTTTCAAC              | CCATCTGCATTCCATCTCTCCTTC            |
| 0.01     | 0.2839  | 10            | 87994       | 0.01     | 0.2860  | GACATGTCAGAAGATATAGGGCATTTCATGCA    | CTTCAGACAGTGGTGAAGAGCAAAAATTTATTGG  |
| 0.02     | 1.0000  | 13            | 75182       | 0.02     | 1.0000  | CCCATGACGGTTGGCTAGGA                | GTTGGGCACTGACTTGCCCTAC              |
| 0.02     | 0.0090  | 9             | 91650       | 0.01     | 0.5766  | CAAACATACTTCTGAGTTCTTTCAGATTTCAAAGC | AAAGAGAAACCAACCTAACTTAAAGGCTTTCCATG |
| 0.01     | 0.7825  | 13            | 78470       | 0.02     | 0.2426  | CTGGGTTCCAGGAACACCAC                | AGGGGGTACAGCTATCACATAGG             |
| 0.03     | 0.4539  | 13            | 68803       | 0.02     | 1.0000  | GAATCTGGCAACACACAGTGTAGC            | GTAAGAAGCCGGCCAAAACCC               |
| 0.03     | 1.0000  | 11            | 70220       | 0.02     | 0.0280  | GCTGACAGTTCAGGCCAGAATG              | GGGGCATATCTGAGTTCCTAG               |
| 0.01     | 1.0000  | 8             | 69836       | 0.01     | 1.0000  | TATTAAGCTTGGCCCAGGTGAGTG            | ATCCCAGTCTAACTGTAGGCAAGC            |
| 0.04     | 1.0000  | 0             | 1312        | 0.00     | 1       | CTCCCAAGTAGCTGGGACTG                | CTCTTCAAAGTGCTTGCGG                 |
| 0.02     | 1.0000  | 18            | 105093      | 0.02     | 1.0000  | CCCAGCTCCAATTTGAAGCTTAC             | CCTGTCAGTTTGATAGGAGAAAAGCAGGA       |
| 0.01     | 0.2028  | 6             | 78900       | 0.01     | 0.2976  | CTAGGCAGCCAGTAACTTTAGGAC            | GCATAGAACAGGTGGCTTGTGCT             |
| 0.01     | 0.2324  | 4             | 72689       | 0.01     | 0.3751  | AAGGCCTCGGACAAAACCTCTGG             | TCTCTGAGGAACTCCAGGTGAGC             |
| 0.02     | 0.8203  | 11            | 84541       | 0.01     | 1.0000  | GTCAAGGTCAAACACACTAGGGG             | CTGGCCTTCACTTTGGAGGTATG             |

### Primers for Illumina Reaction 1

Forward TCTACAGTCCGACGATCA-gene specific sequence  
Reverse GACGTGTGCTCTTCCGATC-gene specific sequence

### Primers for Illumina Reaction 2

Forward Rxn2 AATGATACGGCGACCACCGAGAT**TCTACACGTTTCAGAGTTCTACAGTCCGACGATCA**

Kozich\_bar\_1 CAAGCAGAAGACGGCATAACGAGat**AAGTCGAGATGTGACTGGAGTTCAGACGTGTGCTCTTCCGATC**  
Kozich\_bar\_2 CAAGCAGAAGACGGCATAACGAGat**ATACCTTCGATGTGACTGGAGTTCAGACGTGTGCTCTTCCGATC**  
Kozich\_bar\_3 CAAGCAGAAGACGGCATAACGAGat**AGCTGCTAATGTGACTGGAGTTCAGACGTGTGCTCTTCCGATC**  
Kozich\_bar\_4 CAAGCAGAAGACGGCATAACGAGat**CATAGAGAATGTGACTGGAGTTCAGACGTGTGCTCTTCCGATC**  
Kozich\_bar\_5 CAAGCAGAAGACGGCATAACGAGat**CGTAGATCATGTGACTGGAGTTCAGACGTGTGCTCTTCCGATC**  
Kozich\_bar\_6 CAAGCAGAAGACGGCATAACGAGat**CTCGTTACATGTGACTGGAGTTCAGACGTGTGCTCTTCCGATC**  
Kozich\_bar\_7 CAAGCAGAAGACGGCATAACGAGat**GCGCACGTATGTGACTGGAGTTCAGACGTGTGCTCTTCCGATC**  
Kozich\_bar\_8 CAAGCAGAAGACGGCATAACGAGat**GGTACTATATGTGACTGGAGTTCAGACGTGTGCTCTTCCGATC**  
Kozich\_bar\_9 CAAGCAGAAGACGGCATAACGAGat**GTATACGCATGTGACTGGAGTTCAGACGTGTGCTCTTCCGATC**  
Kozich\_bar\_10 CAAGCAGAAGACGGCATAACGAGat**TACGAGCAATGTGACTGGAGTTCAGACGTGTGCTCTTCCGATC**  
Kozich\_bar\_11 CAAGCAGAAGACGGCATAACGAGat**TCAGCGTTATGTGACTGGAGTTCAGACGTGTGCTCTTCCGATC**  
Kozich\_bar\_12 CAAGCAGAAGACGGCATAACGAGat**TCGCTACGATGTGACTGGAGTTCAGACGTGTGCTCTTCCGATC**

### Custom Sequencing Primers

NewIndex\_Read **GATCGGAAGAGCACACGTCTGAACTCCAGTCACAT**  
NewRead\_1 **TCTACACGTTTCAGAGTTCTACAGTCCGACGATCA**  
NewRead\_2 **TGTGACTGGAGTTCAGACGTGTGCTCTTCCGATC**
